# Supplementary material
Source: PubMed Central journal article supplement (PMC5843899)

| Fusion | Elisa +/- pY | IB on lys. | IB on SOS-1-IP | IP pY-SOS-1 | IF on Oex | Clones     | IB on Oex | IB on SOS-1-IP | IP pY-SOS-1 |
|--------|--------------|------------|----------------|-------------|-----------|------------|-----------|----------------|-------------|
|        |              |            |                |             |           |            |           |                |             |
| Fusion | AR5          | ++++       | -              | -           | -         |            |           |                |             |
|        | Al10         | +          | -              | -           | -         |            |           |                |             |
|        | AD9          | -          | -              | -           | -         |            |           |                |             |
|        | BS12         | ++++       | -              | ++          | -         | BS12/36/6  | +         | -              |             |
|        | BR6          | -          | -              | -           | -         | BS12/36/7  | +         | +              |             |
|        | BI20         | ++++       | +              | +           | -         | BI20/21/4  | +         | -              |             |
|        | BF5          | -          | -              | -           | -         | BI20/21/7  | +         | -              |             |
|        | BD7          | ++++       | +              | +           | +         | BD7/26/9   | +         | -              | +           |
|        | BPA2         | -          | -              | -           | -         | BD7/26/12  | +         | -              | +           |
|        | BQF12        | -          | -              | -           | -         |            |           |                |             |
|        | BRH5         | -          | -              | -           | -         |            |           |                |             |
|        | BYA12        | -          | -              | -           | -         |            |           |                |             |
|        | BA2A2        | -          | -              | -           | -         |            |           |                |             |
|        | AJB3         | -          | -              | -           | -         |            |           |                |             |
|        | AJB4         | ++++       | -              | -           | -         |            |           |                |             |
|        | ARB2         | -          | -              | -           | -         |            |           |                |             |
|        | BA1H3        | -          | -              | -           | -         |            |           |                |             |
|        | BSG7         | -          | -              | -           | -         |            |           |                |             |
|        | BXF10        | -          | -              | -           | -         |            |           |                |             |
|        | BAE4         | -          | -              | -           | -         |            |           |                |             |
|        | BED2         | ?          | -              | -           | -         |            |           |                |             |
|        | BFA8         | -          | -              | -           | -         |            |           |                |             |
|        | BFD7         | ?          | -              | -           | -         |            |           |                |             |
|        | BTB1         | -          | -              | -           | -         |            |           |                |             |
|        | BJA2         | -          | -              | -           | -         |            |           |                |             |
|        | AWA6         | -          | -              | -           | -         |            |           |                |             |
|        | AFG12        | ++++       | +              | +           | -         | AFG12/15/  | +         | +              |             |
|        | ALH7         | -          | -              | -           | -         | AFG12/15/  | +         | -              |             |
|        | AHA11        | -          | -              | -           | -         |            |           |                |             |
|        | ACD12        | -          | -              | -           | -         |            |           |                |             |
| AIA12  | ?            | -          | -              | -           |           |            |           |                |             |
| S      | ZT3          | ++++       | ++             | ++++        | +         | VP20/40/2  | -         | -              |             |
|        | VP20         | ++++       | ++++           | ++++        | -         | VP20/40/1  | -         | -              |             |
|        | ZA12         | ++++       | +++            | ++++        | -         | VP20/18/2  | -         | -              |             |
|        | ZB17         | ++++       | ++             | +++         | -         | VP20/18/1  | -         | -              |             |
| N      | TR16         | ++++       | ++++           | ++          | ++        | TR16/7/3   | ++++      | ++             | ++          |
|        | SA13         | ++++       | -              | ++          | -         | TR16/28/23 |           |                | ++          |
| F      | TP36         | ++++       | +++            | +           | -         |            |           |                |             |
|        | ZF34         | ++++       | +++            | ++          | +         |            |           |                |             |
|        | TR54         | ++++       | -              | -           | ++        | TR54       |           |                | -           |
|        | TB47         | ++++       | ++             | ++++        | +         | TR54       |           |                | -           |
| O      | TF7          | ++++       | ++++           | +++         | ++        | TF7/28/23  | ++++      | ++++           | ++++        |
|        | TB74         | +          | -              | +           | -         | TF7/28/37  | ++++      | ++++           | ++++        |

B

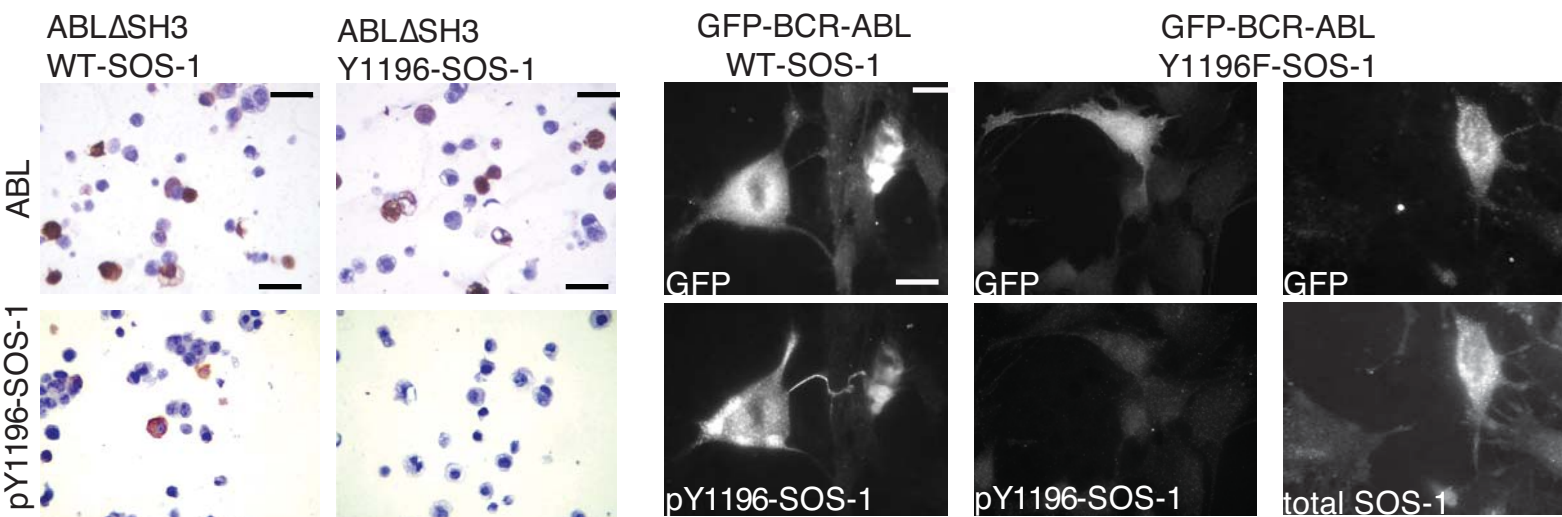

Supplement: leu2017267x3.pdf [file leu2017267x3.pdf]
