# Supplementary material
Source: PubMed Central journal article supplement (PMC5843899)

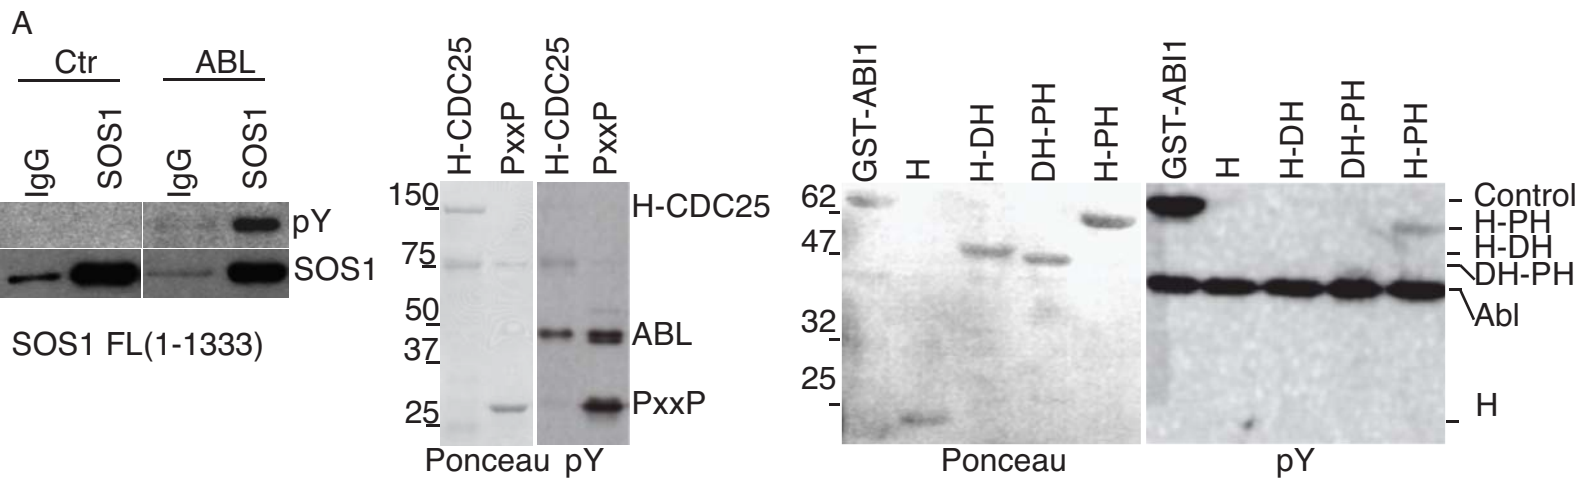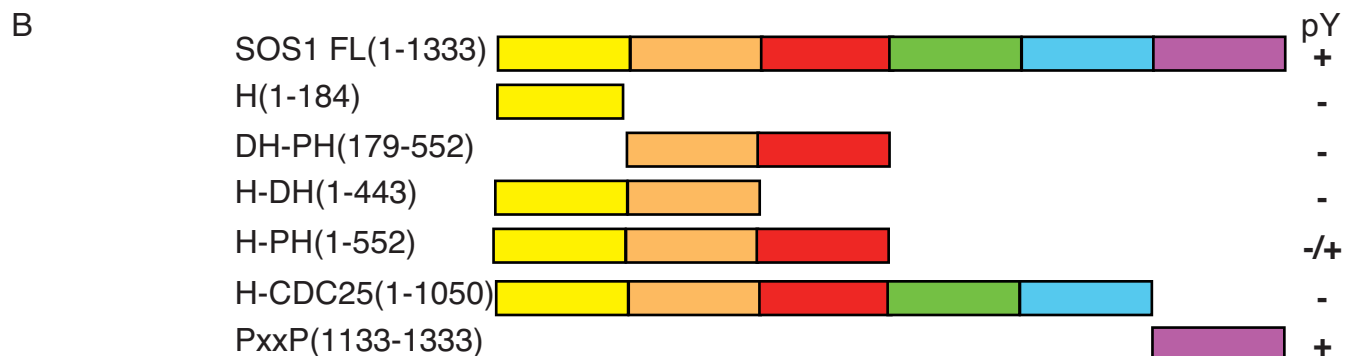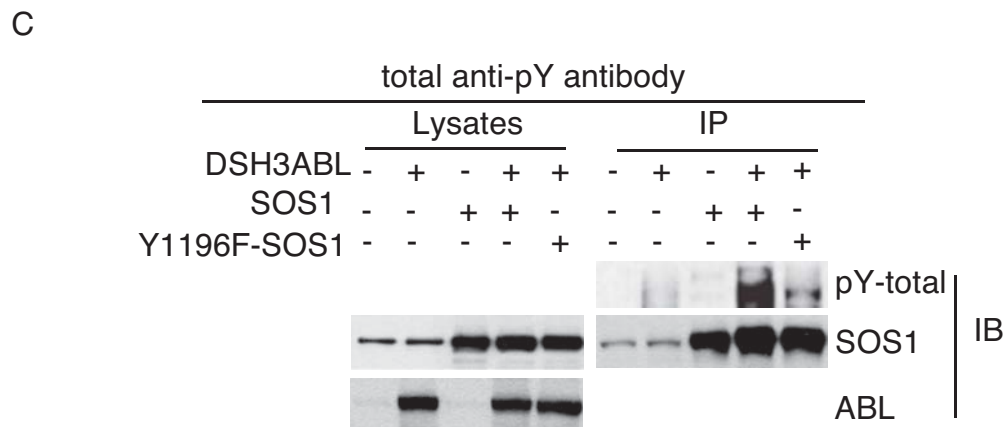

Supplement: leu2017267x2.pdf [file leu2017267x2.pdf]

A

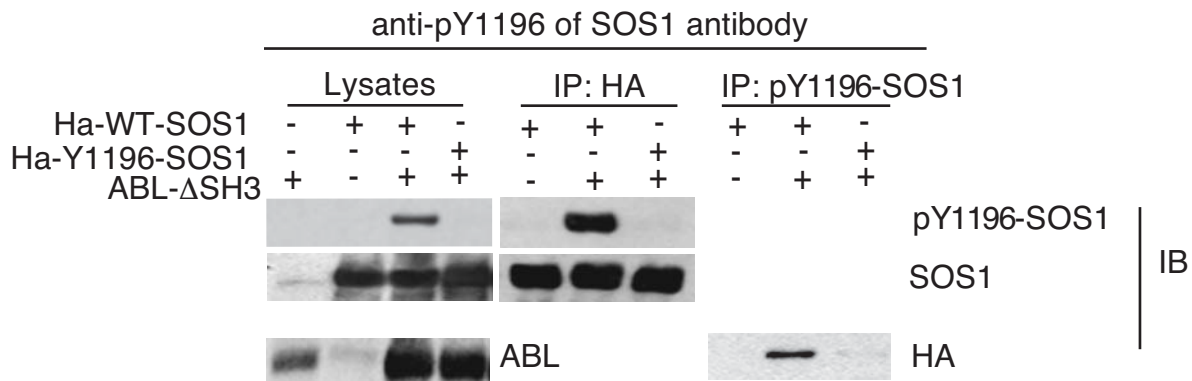

B

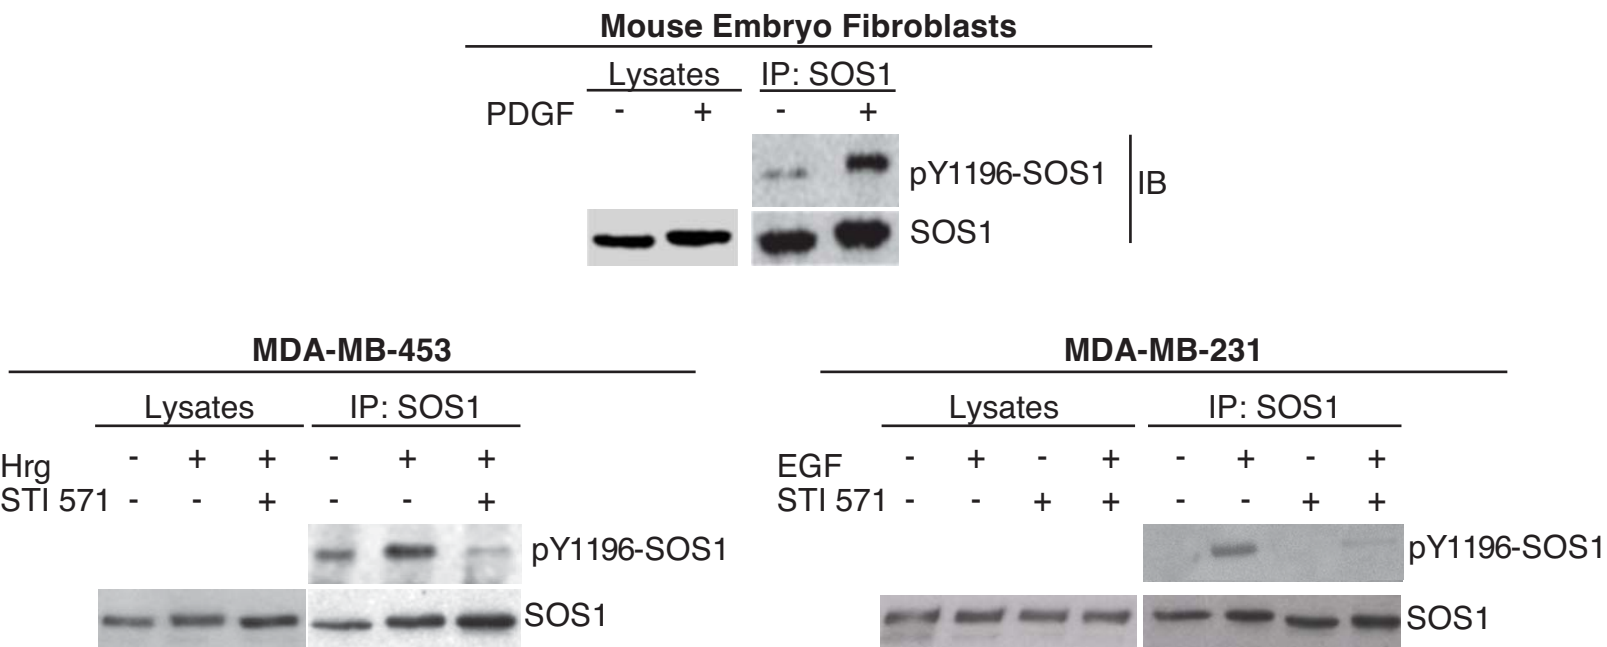

Supplement: leu2017267x4.pdf [file leu2017267x4.pdf]

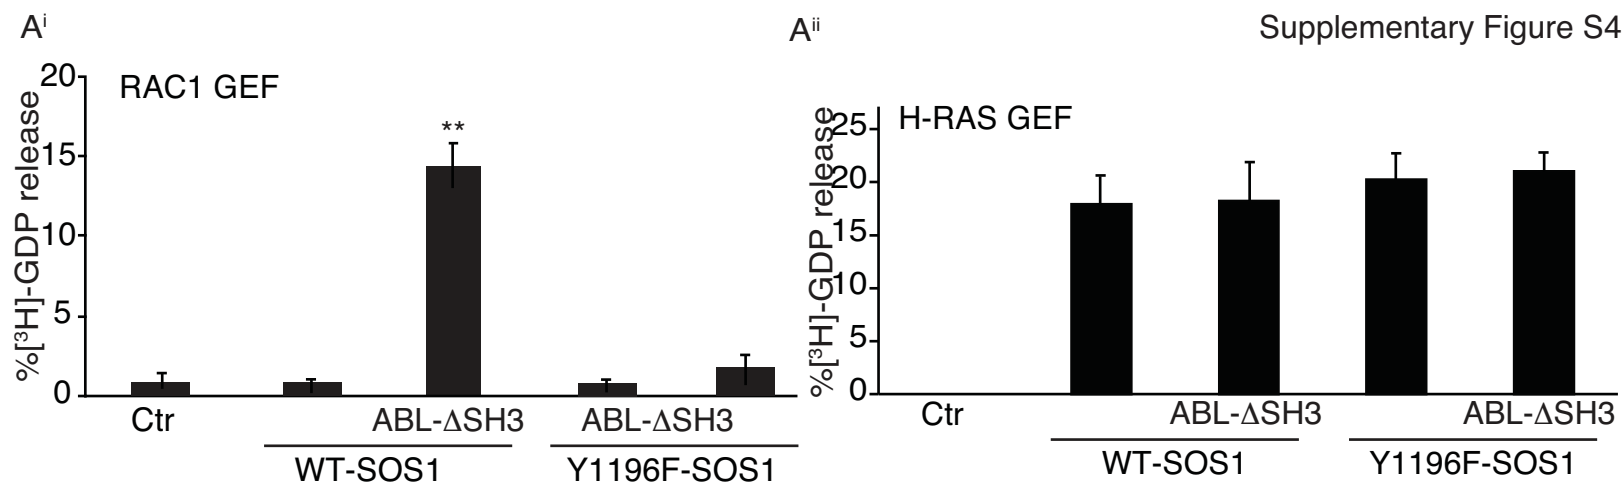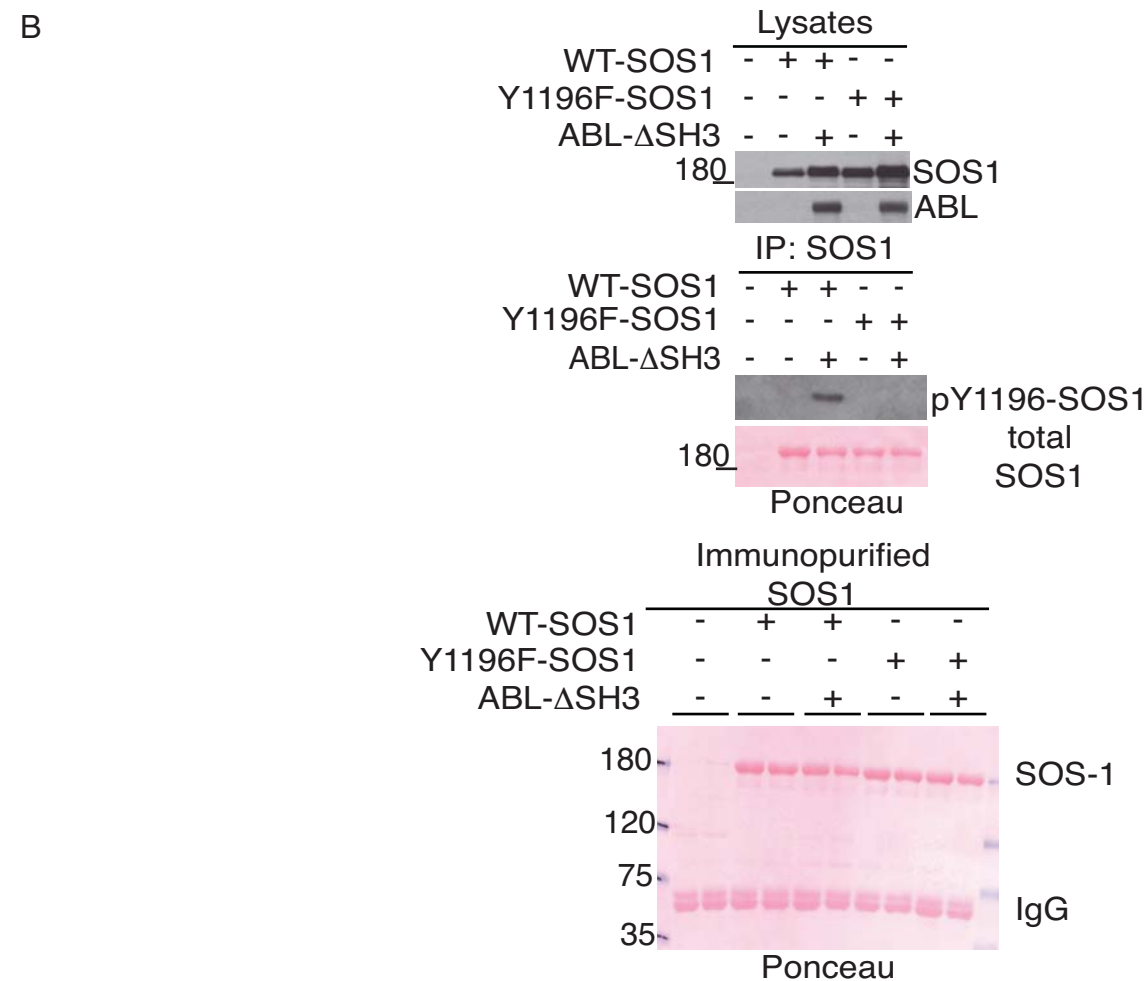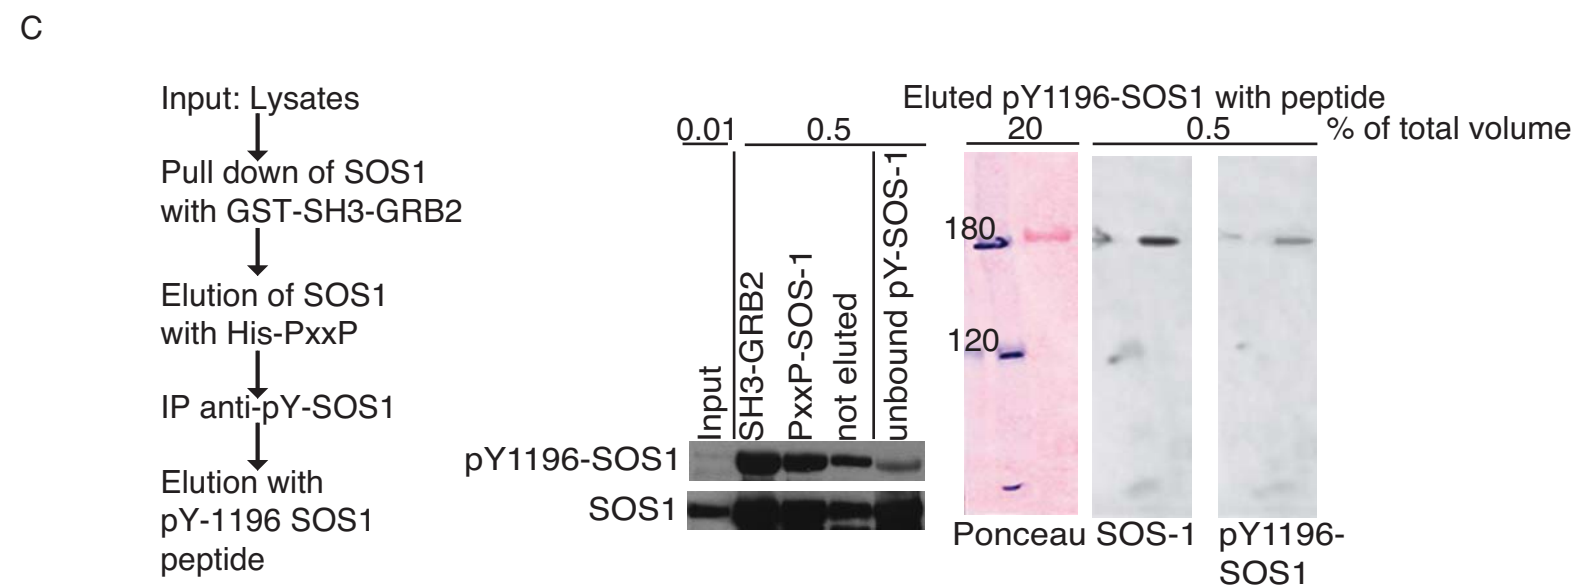

Supplement: leu2017267x5.pdf [file leu2017267x5.pdf]

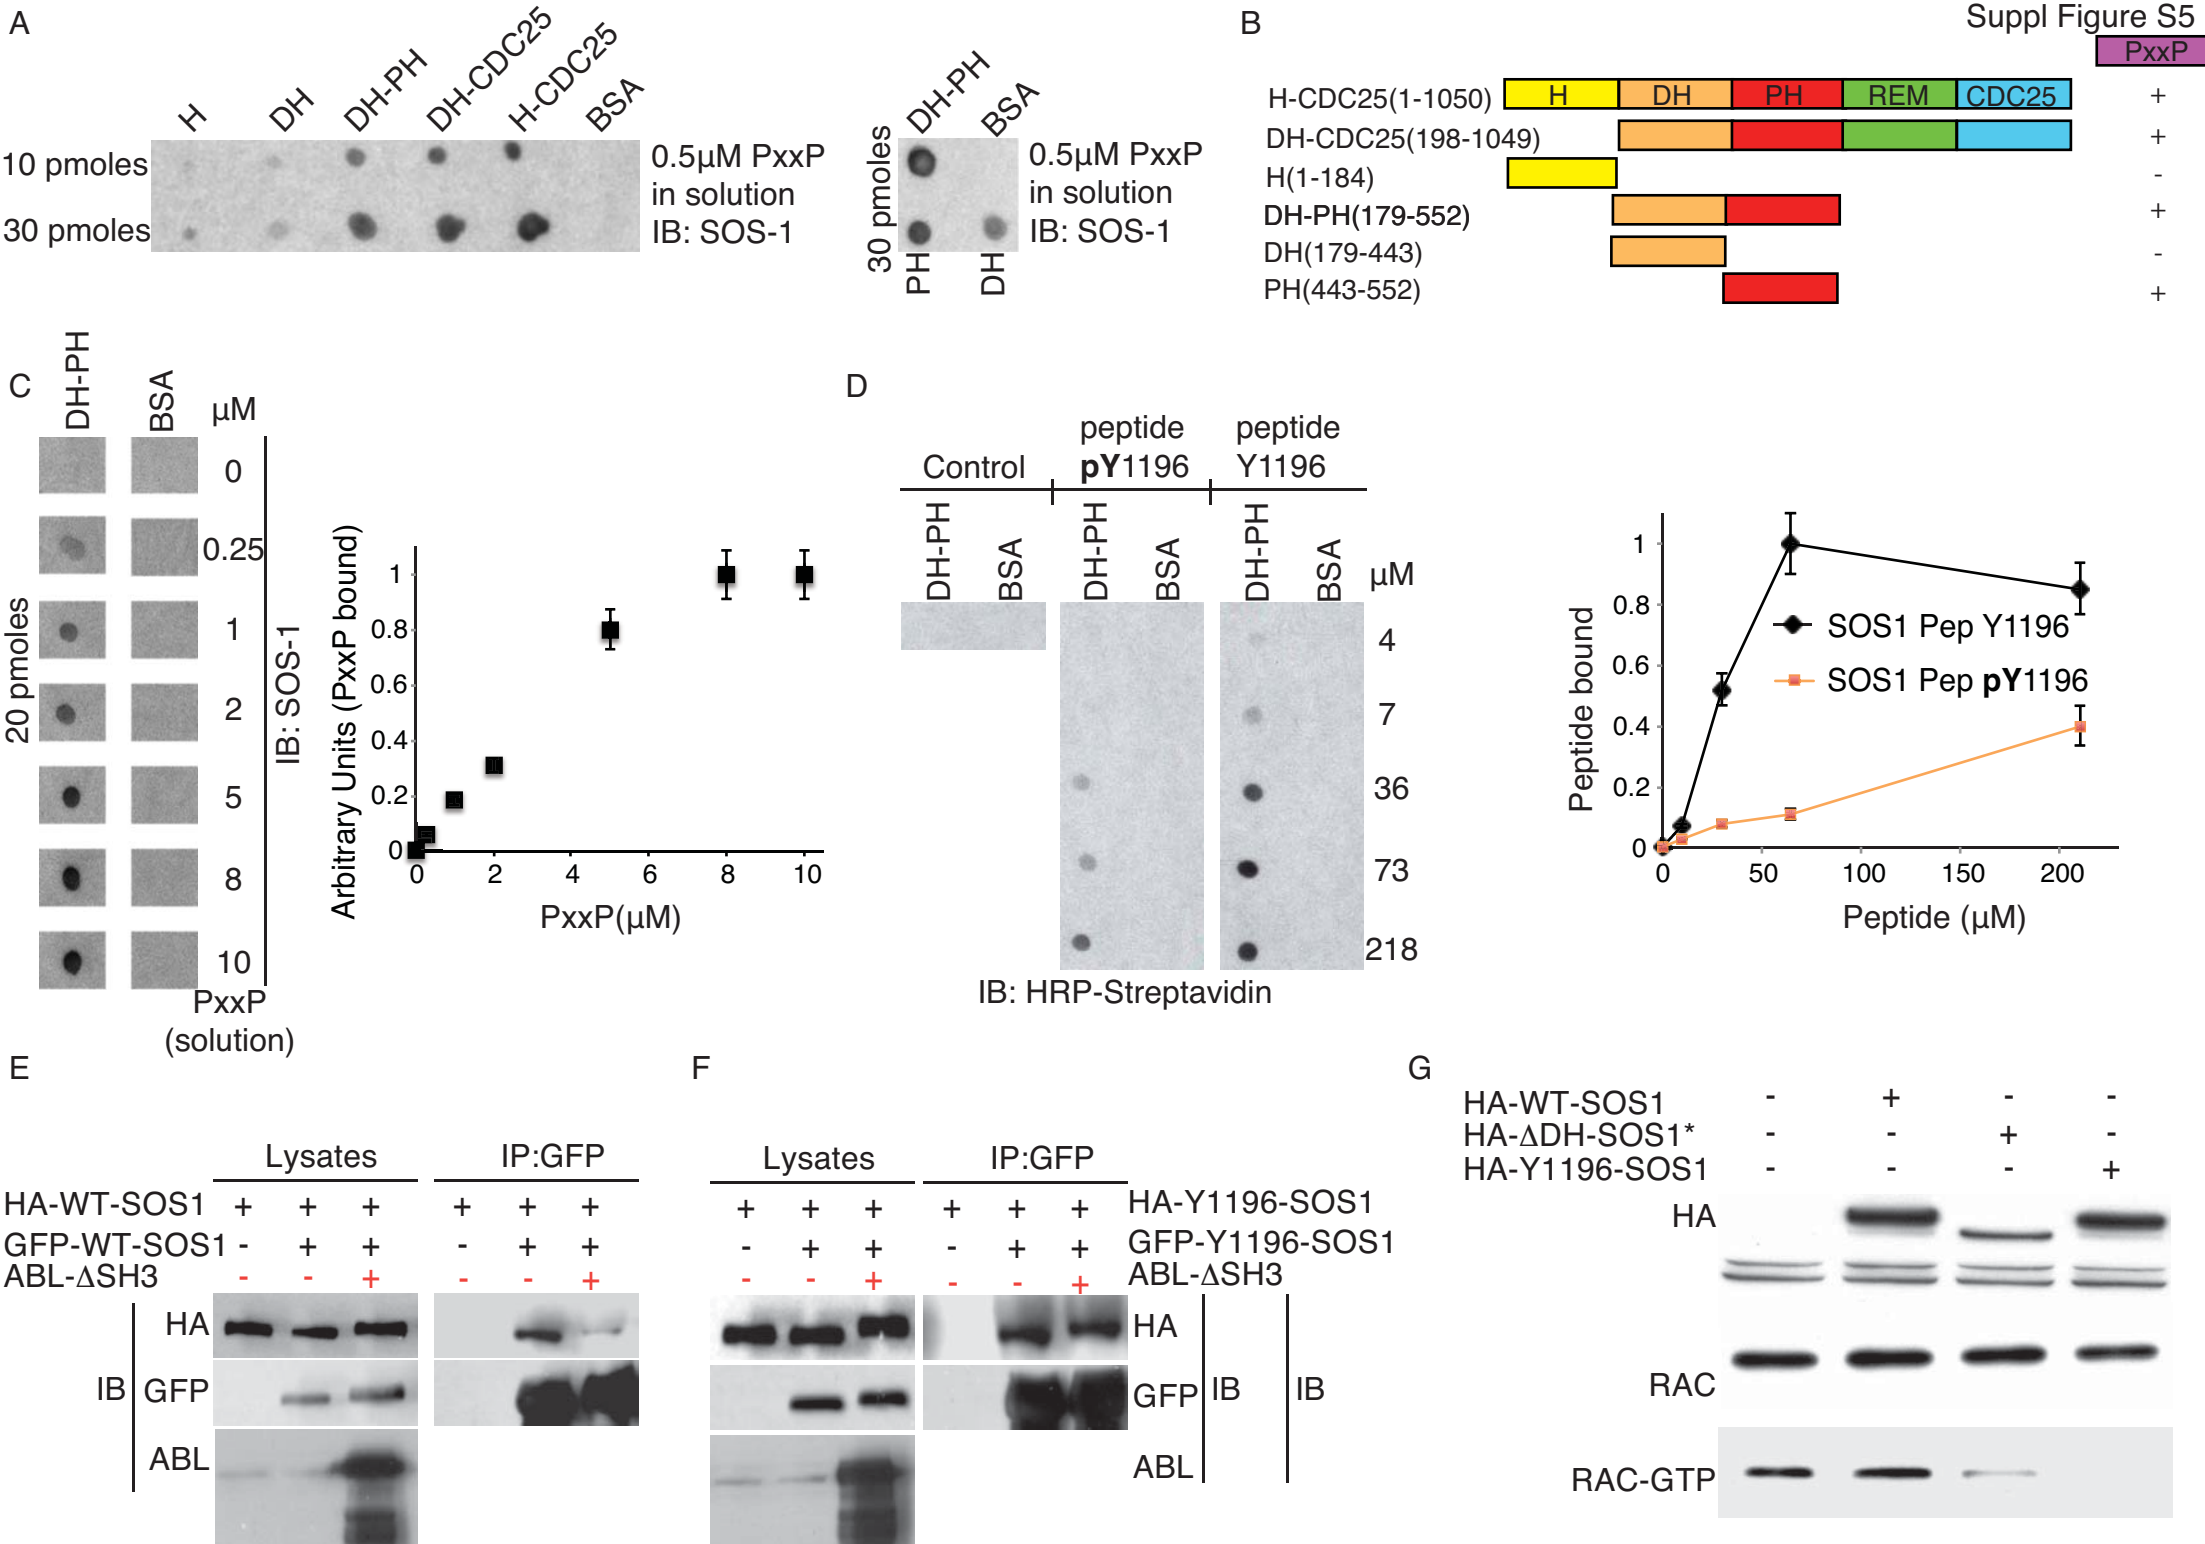

Supplement: leu2017267x6.pdf [file leu2017267x6.pdf]

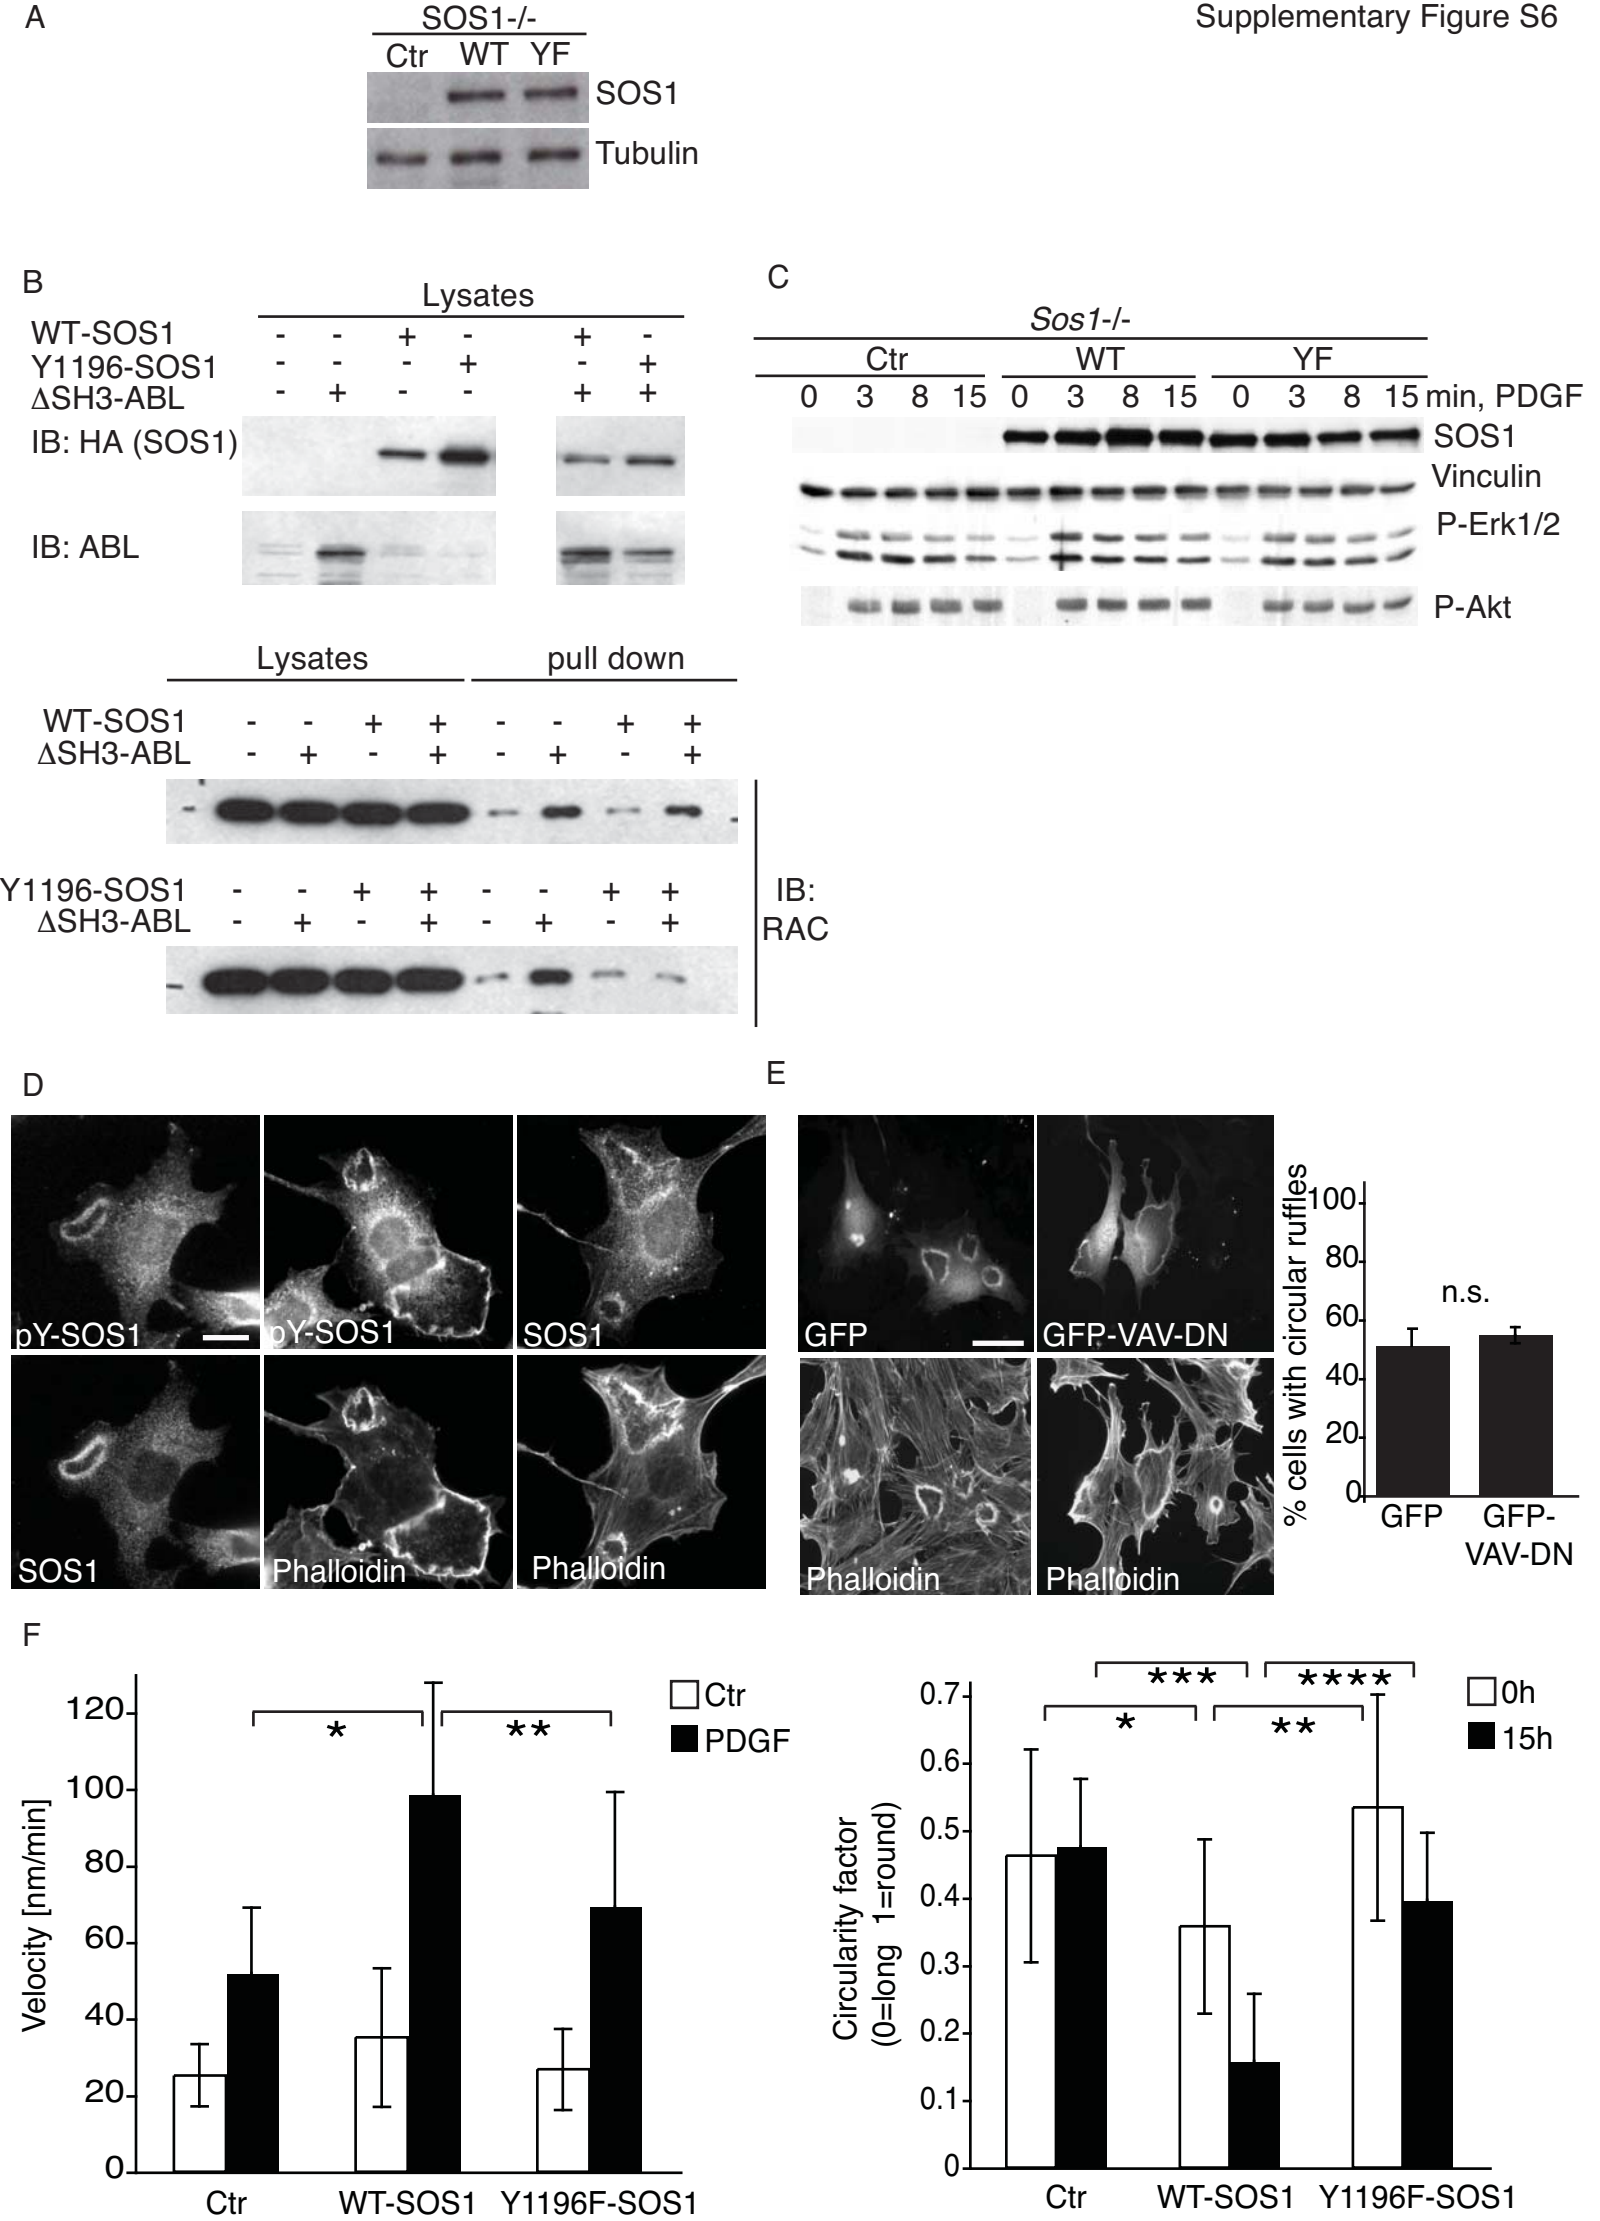

Supplement: leu2017267x7.pdf [file leu2017267x7.pdf]

A

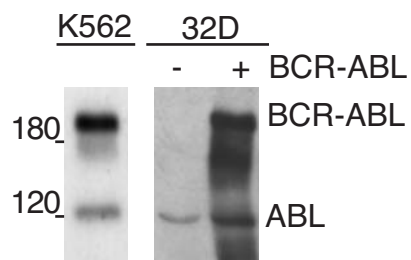

B

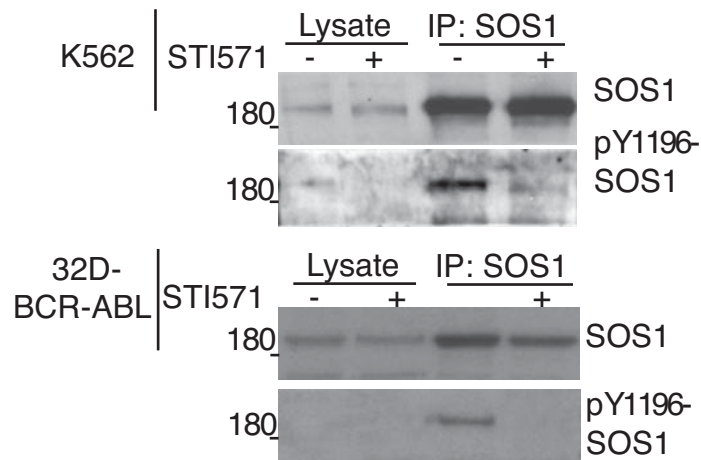

C

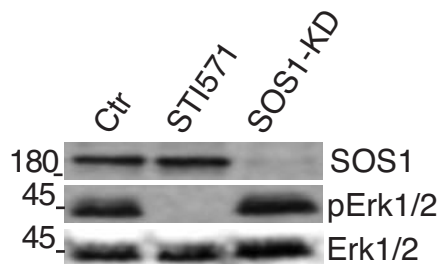

D

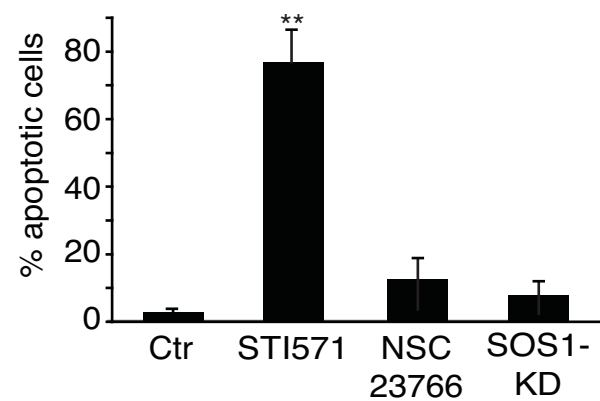

E

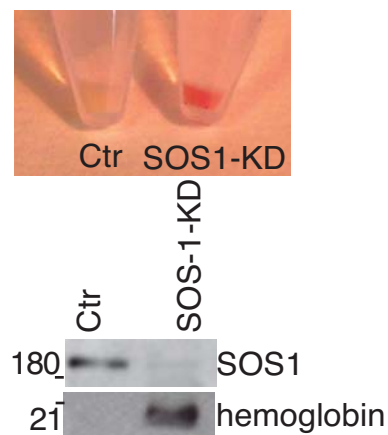

Supplement: leu2017267x8.pdf [file leu2017267x8.pdf]
